# Supplementary figures and images for: Functional analysis of Kaposi's sarcoma–associated herpesvirus vFLIP expression reveals a new mode of IRES-mediated translation
Source: PubMed Central journal article supplement — RNA. 2014 Nov;20(11):1803–14. doi: 10.1261/rna.045328.114 (PMC4201831; doi:10.1261/rna.045328.114), 2014-11

# Supplementary Figure 1

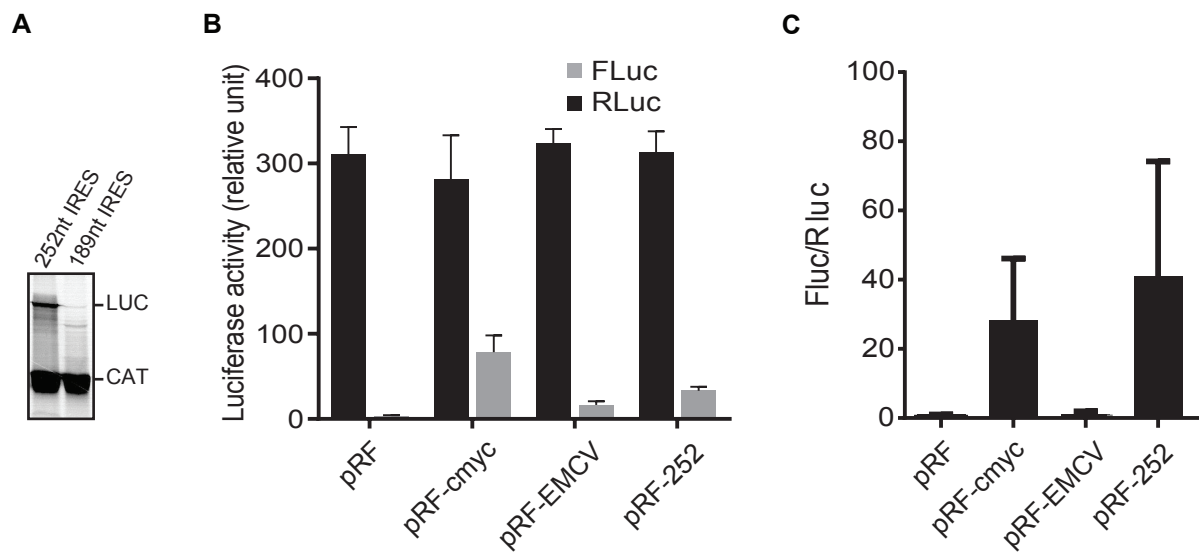

Supplement: supp_045328.114_FigS1.pdf [file supp_045328.114_FigS1.pdf]

# Supplementary Figure 2

**A**

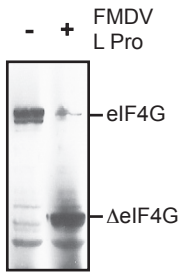

**B**

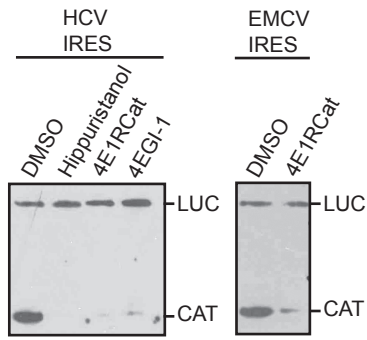

Supplement: supp_045328.114_FigS2.pdf [file supp_045328.114_FigS2.pdf]

Supplementary Figure 3

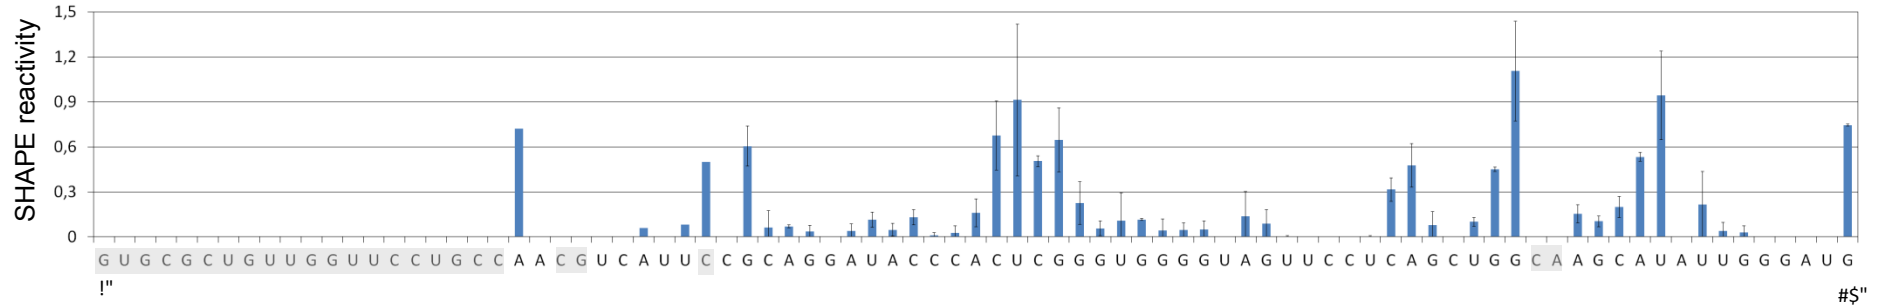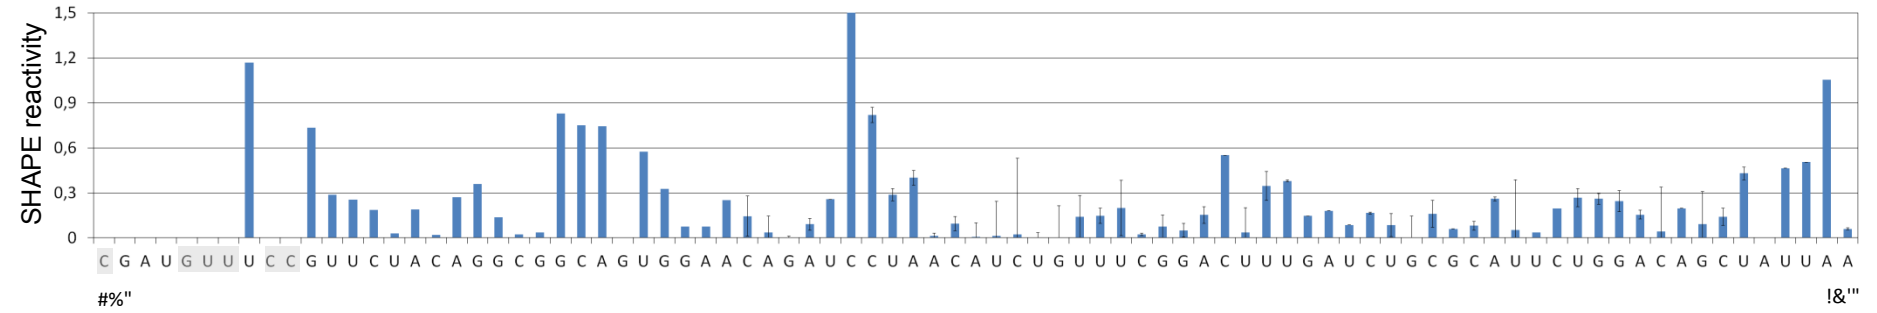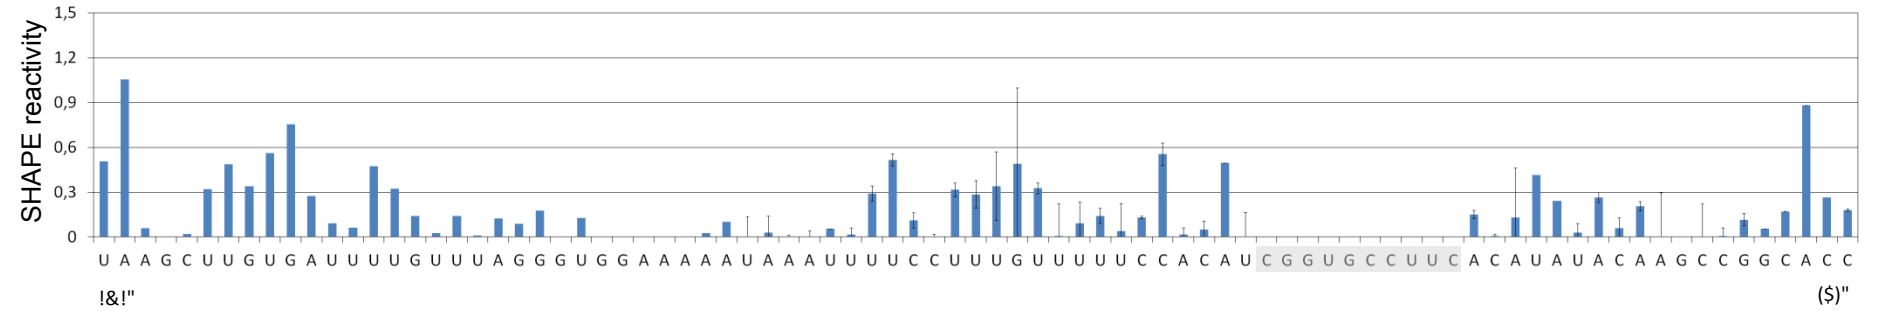

Supplement: supp_045328.114_FigS3.pdf [file supp_045328.114_FigS3.pdf]
